# Supplementary material
Source: PubMed Central journal article supplement (PMC1458878)

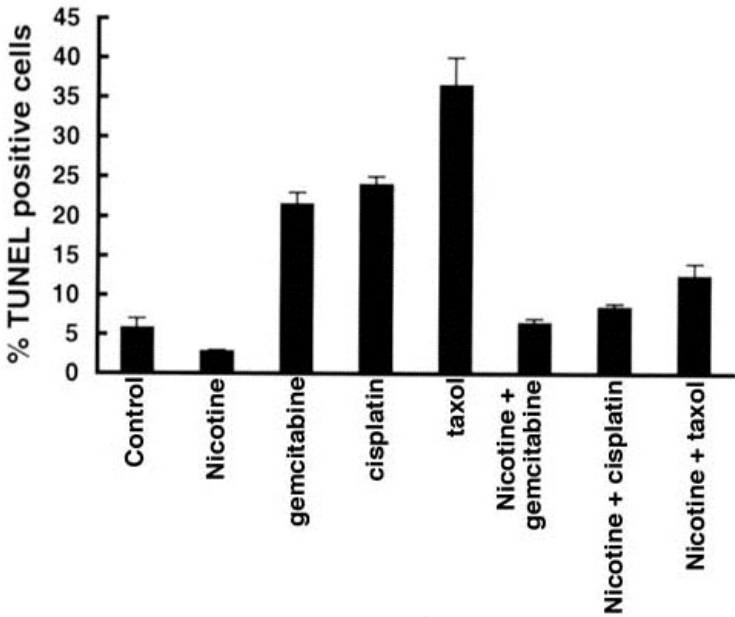

Supplement: pnas_0509313103_2.pdf [file pnas_0509313103_2.pdf]

**(a)**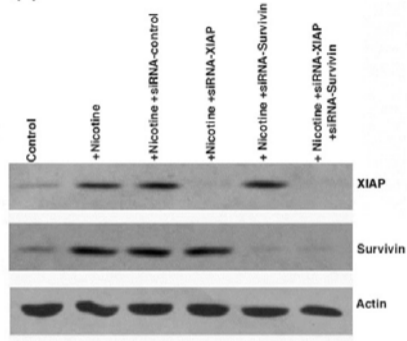**(b)**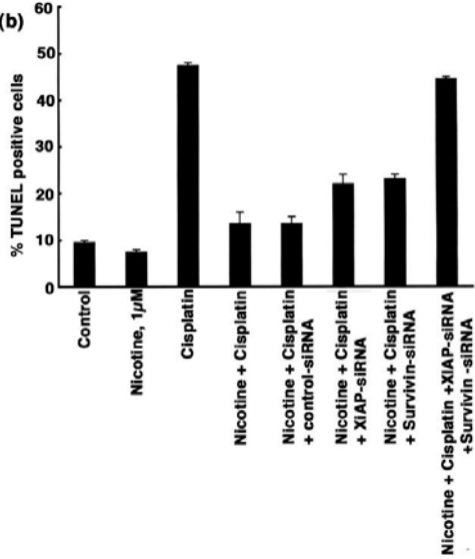

Supplement: pnas_0509313103_4.pdf [file pnas_0509313103_4.pdf]

**(a)**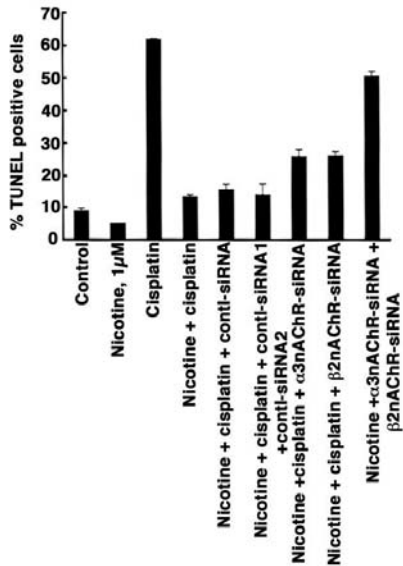**(b)**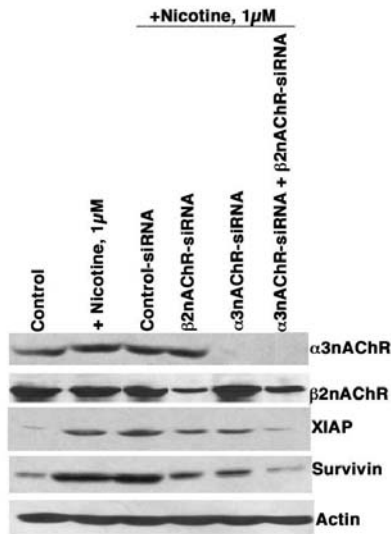

Supplement: pnas_0509313103_5.pdf [file pnas_0509313103_5.pdf]

**Control**

**+Nicotine**

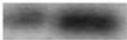

**Survivin**

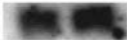

**XIAP**

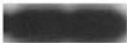

**GAPDH**

Supplement: pnas_0509313103_6.pdf [file pnas_0509313103_6.pdf]
